# Supplementary material
Source: PubMed Central journal article supplement (PMC2650182)
Supplement: 0809035106_0809035106SI.pdf [file 0809035106_0809035106SI.pdf]

# Supporting Information

Winkler *et al.* 10.1073/pnas.0809035106

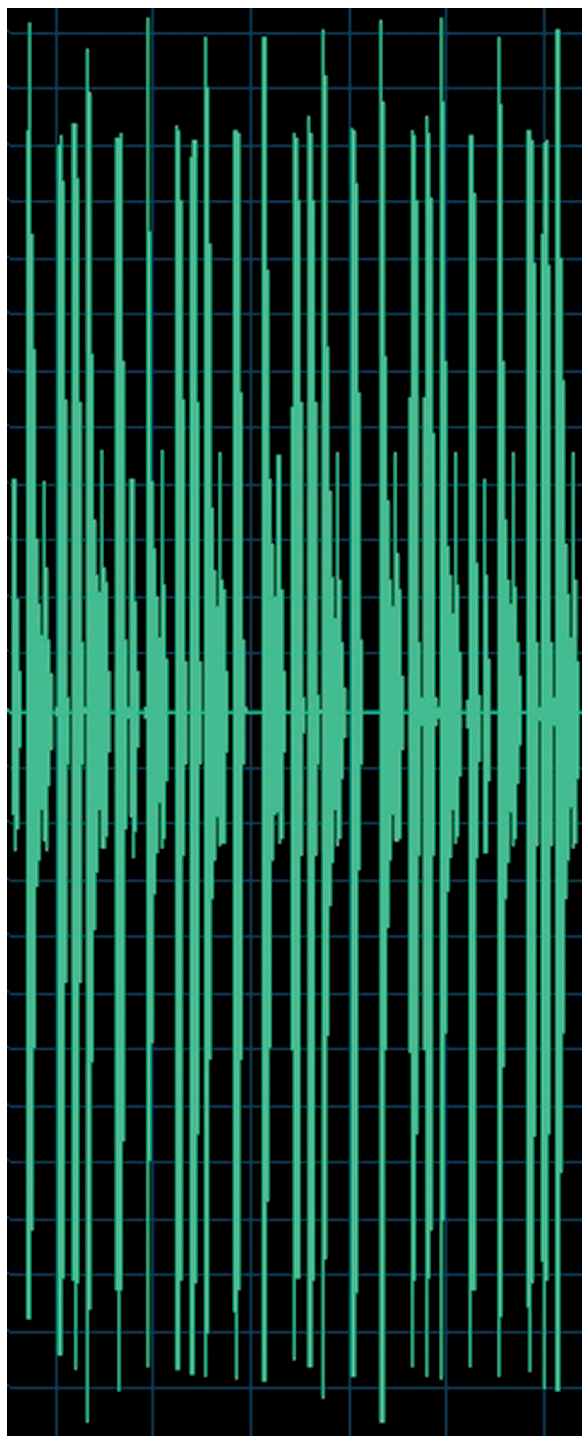

**Sound File S1.** Sample of the rhythmic sound sequence presented to newborn infants. This rock accompaniment is based on hi-hat, snare, and bass drum sounds. The sequence is composed of the S1–S4 ( $4 \times 22.5\%$ ) and the D pattern (10%) shown in Fig. 1 of the article. Adults perceive the S1–S4 patterns as regular, whereas the D pattern is perceived as strongly syncopated.

[Sound File S1 \(MP3\)](#)
